# Supplementary material
Source: publisher figshare collection journal article supplement (https://karger.figshare.com/articles/dataset/_/5241280)
Supplement: Supplementary file 1 [file 1]

## Erratum

---

In the article by Gordon et al., 'A New Expectation-Maximization Statistical Test for Case-Control Association Studies Considering Rare Variants Obtained by High-Throughput Sequencing' [Hum Hered 2011;71:113–125], an author name has been misspelled: Francisco De La Vega has to be Francisco M. De La Vega.
